# Xenon and Isoflurane Reduce Left Ventricular Remodeling after Myocardial Infarction in the Rat

Anna B. Roehl, M.D.,\* Sandra Funcke, M.D.,† Michael M. Becker, M.D.,‡ Andreas Goetzenich, M.D.,§ Christian Bleilevens, M.Sc.,|| Rolf Rossaint, M.D.,# Paul Steendijk, M.D., Ph.D.,\*\* Marc Hein, M.D.\*

## ABSTRACT

**Background:** Xenon and isoflurane are known to have cardioprotective properties. We tested the hypothesis that these anesthetics positively influence myocardial remodeling 28 days after experimental perioperative myocardial infarction and compared their effects.

**Methods:** A total of 60 male Sprague–Dawley rats were subjected to 60 min of coronary artery occlusion and 120 min of reperfusion. Prior to ischemia, the animals were randomized for the different narcotic regimes (0.6 vol% isoflurane, 70 vol% xenon, or intraperitoneal injection of s-ketamine). Acute injury was quantified by echocardiography and troponin I. After 4 weeks, left ventricular function was assessed by conductance catheter to quantify hemodynamic compromise. Cardiac remodeling was characterized by quantification of dilatation, hypertrophy, fibrosis, capillary density, apoptosis, and expression of fetal genes ( $\alpha/\beta$  *myosin heavy chains*,  $\alpha$ -*skeletal actin*, *periostin*, and *sarco/endoplasmic reticulum Ca<sup>2+</sup>-ATPase*).

**Results:** Whereas xenon and isoflurane impeded the acute effects of ischemia-reperfusion on hemodynamics and myocardial injury at a comparable level, differences were found

## What We Already Know about This Topic

- Previous studies have demonstrated that xenon and isoflurane have cardioprotective properties.
- However, little is known about the long-term effects of xenon and isoflurane on cardiac remodeling after perioperative myocardial infarction. This study determined the long-term effects of anesthetic preconditioning on cardiac remodeling after perioperative myocardial infarction using a rat model of left ventricular ischemia-reperfusion injury.

## What This Article Tells Us That Is New

- Compared to isoflurane, xenon limited adverse cardiac remodeling and contractile dysfunction after perioperative myocardial infarction.

after 4 weeks. Xenon in contrast to isoflurane or ketamine anesthetized animals demonstrated a lower remodeling index ( $0.7 \pm 0.1$  vs.  $0.9 \pm 0.3$  and  $1.0 \pm 0.3$  g/ml), better ejection fraction ( $62 \pm 9$  vs.  $49 \pm 7$  and  $35 \pm 6\%$ ), and reduced expression of  $\beta$ -*myosin heavy chain* and *periostin*. The effects on hypertrophy, fibrosis, capillary density, and apoptosis were comparable.

**Conclusions:** Compared to isoflurane and s-ketamine, xenon limited progressive adverse cardiac remodeling and contractile dysfunction 28 days after perioperative myocardial infarction.

**P**ERIOPERATIVE myocardial infarction is a serious adverse event during surgery and is associated with high complication and mortality rates.<sup>1</sup> Left ventricular remodeling following myocardial infarction leads to progressive hypertrophy, chamber dilatation, and ultimately heart failure. Treatments that block the  $\beta$ -adrenergic and renin–angiotensin–aldosterone system, as well as mechanical support, can limit or reverse this process.<sup>2,3</sup> The extent of the remodeling process is highly dependent on the initial infarct size and thus could be limited by myocardial salvage achieved by reperfusion therapy.<sup>4</sup> As shown in short-term studies, anesthetic preconditioning not only reduces initial myocardial injury,<sup>5,6</sup> but also prevents activation of the deleterious gene expression profile.<sup>7</sup> However, long-term effects of anesthetic preconditioning on cardiac remodeling with respect to long-term function after transient ischemia have yet to be identified. Therefore, we used a rat model of left ventricular ischemia-reperfusion (IR) injury to examine the effects of isoflurane and xenon anesthesia on cardiac function, structure, and expression of fetal genes after 4 weeks.

\* Anesthetist, Department of Anesthesiology, University Hospital Aachen, Aachen, Germany. † Resident, Department of Anesthesiology, University Medical Center Hamburg-Eppendorf, Hamburg, Germany. ‡ Cardiologist, Department of Cardiology, University Hospital Aachen. § Anesthetist, Department of Cardiac Surgery, University Hospital Aachen. || Research Assistant, Department of Anesthesiology, University Hospital Aachen. # Professor, Department of Anesthesiology, University Hospital Aachen. \*\* Associate Professor, Department of Cardiothoracic Surgery, Leiden University Medical Center, Leiden, The Netherlands.

Received from the Department of Anesthesiology, University Hospital of Aken, Aachen, Germany. Submitted for publication July 20, 2012. Accepted for publication December 20, 2012. This study was supported by the German Research Foundation (Bonn, Germany; Fund No. Ro 2000/10–1) and Air Liquide Medical GmbH (Düsseldorf, Germany). This study was presented at the “25. Wissenschaftliche Arbeitstage der DGAI,” Würzburg, Germany, on February 11, 2011.

Address correspondence to Dr. Hein: Department of Anesthesiology, University Hospital of Aken, Pauwelsstrasse 30, 52074 Aachen, Germany. mhein@ukaachen.de. Information on purchasing reprints may be found at [www.anesthesiology.org](http://www.anesthesiology.org) or on the masthead page at the beginning of this issue. ANESTHESIOLOGY's articles are made freely accessible to all readers, for personal use only, 6 months from the cover date of the issue.

Copyright © 2013, the American Society of Anesthesiologists, Inc. Lippincott Williams & Wilkins. Anesthesiology 2013; 118:1385–94

## Materials and Methods

### Animals

A total of 60 male Sprague–Dawley rats (10–12 weeks old, 350–420 g) were purchased from Charles River Laboratories (Charles River, Sulzfeld, Germany). All of the experiments were performed in accordance with the German legislation governing animal studies, followed *The Principles of Laboratory Animal Care* (National Institute of Health, publication No. 85-23, revised in 1996), and had prior approval by the governmental animal care and use office (Landesamt für Natur, Umwelt und Verbraucherschutz Nordrhein-Westfalen, Recklinghausen, Germany, Protocol No. 9.93.2.10.35.07.210).

### Instrumentation and Protocol on Day 0

After induction of anesthesia by an intraperitoneal injection of 200 mg/kg *s*-ketamine (Pfizer, Berlin, Germany), a three-lead electrocardiogram was installed, and the first echocardiographic examination with a 10-MHz probe (Vivid I, GE, Solingen Germany) was performed. The animals were orally intubated and ventilated with 30% oxygen and 70% nitrogen in a pressure-controlled mode with a positive end-expiratory pressure of 5 cm H<sub>2</sub>O using a closed-circuit anesthesia machine to control the end-tidal carbon dioxide concentration (Physioflex<sup>+</sup>, Draeger, Luebeck, Germany). The left jugular vein was catheterized with a 22G cannula (Leader Flex, Vygon, Aachen, Germany) for fluid replacement (10 ml • kg<sup>-1</sup> • h<sup>-1</sup> Ringer's solution) and blood withdrawal. The anesthetic depth was evaluated every 30 min by tail pinch. In case of limb movement or an increase in heart rate (HR), 50 mg/kg *s*-ketamine was injected intraperitoneally. Blood pressure was monitored by a 1.4F pressure catheter (SPR-671, Millar Instruments, Houston, TX) through the right femoral artery. The animals were placed on a feedback-controlled heating pad to maintain the body temperature at 37°C (TCAT-2 controller; Physitemp, Clifton, NJ). After a left lateral thoracotomy between the fourth and fifth rib, a ligature was placed around the left anterior descending coronary artery. Subsequently, the animals were randomly divided into four groups, using a sealed envelope system (see fig. 1). Identification numbers provided by the animal facility were used as pseudonyms to blind the assessor for future investigations and analysis. The treatment groups received 0.43 minimum alveolar concentration (MAC) of the anesthetic gases, respectively, 0.6 vol% isoflurane (Forene, Abbott, Wiesbaden, Germany) or 70 vol% xenon (LENOXe, Air Liquide Medical GmbH, Düsseldorf, Germany), as a substitute for nitrogen. The control and sham groups received additional *s*-ketamine to maintain anesthesia. After 1 h, the left anterior descending coronary artery was occluded for 1 h, except in the sham group. After 2 h of reperfusion, the wounds were closed in layers and anesthesia was stopped. A second echocardiogram was performed after the animals were extubated and sufficient spontaneous breathing was achieved. For postoperative analgesia, the wounds were infiltrated with 1 ml 0.5%

ropivacaine (Astra Zeneca, Wedel, Germany). Metamizole (Ratiopharm, Ulm, Germany) was injected intraperitoneally (20 mg/kg) and added to the tap water (10 mg/ml/kg) for 3 days. The rats were transferred to a warm isolation chamber (Vetario S10 Intensive Care Unit, Brinsea, Sandford, United Kingdom) for recovery.

### Instrumentation on Day 28

Anesthesia was induced with a reduced intraperitoneal dosage of *s*-ketamine (120 mg/kg). A three-lead electrocardiogram was obtained and a third echocardiographic examination performed. The animals were intubated and ventilated as on the first day. The right jugular vein was catheterized, and a 2F conductance catheter (SPR-869, Millar Instruments, Houston, TX) was inserted via the right carotid artery into the left ventricle. Parallel conductivity was determined by three intravenous injections of 100 µL 10% saline. Pressure volume loops were recorded during apnea and gradual, short-term reduction of preload. To this end, the inferior caval vein was compressed with a cotton bud through a small subxiphoidal incision. After hemodynamic measurements and blood withdrawal, the animals were killed by intravenous injection of potassium chloride and the heart was excised for further analysis.

### Hemodynamic Calculations

All signals were collected at a sampling rate of 1000 Hz using a data acquisition system (Power Lab 8/30, ADInstruments, Colorado Springs, CO). Time intervals of 10 s were analyzed with dedicated software (LabChart 6 Pro, ADInstruments GmbH, Spechbach, Germany; Circlab 2010, Paul Steendijk, Leiden, The Netherlands) at the following time points (see fig. 1): At baseline (T0), 50 min after application of inhalative narcotics just before start of ischemia (T1), 50 min after induction of ischemia (T2), 110 min after start of reperfusion (T3), and 60 min after instrumentation on day 28 (T4). The HR was derived from the electrocardiogram, and the systolic arterial pressure (sAP) from the pressure signal of the conductance catheter. The left ventricular end-diastolic volume (EDV) and ejection fraction (EF) were calculated using the volume signal of the conductance catheter after calibration for parallel conductance and slope factor  $\alpha$ . Parallel conductance was obtained by the hypertonic saline method.<sup>8</sup> Slope factor  $\alpha$  was calculated as the ratio of cardiac output (CO) determined by conductance and by echocardiography. Myocardial contractility was quantified by the slope of the preload recruitable stroke work ( $S_{\text{PRSW}}$ ), which equates to the linear relation of EDV and stroke work, obtained from five consecutive caval occlusions.<sup>9,10</sup>

### Echocardiography

B-mode recordings with a frame rate of 190/s from short- and long-axis parasternal views were analyzed using post-processing software (EchoPAC PC V108.1.4, GE Healthcare, Munich, Germany). CO was calculated using the aortic

velocity time integral (long-axis view), cross-sectional area, and HR.<sup>11</sup> The left ventricular end-diastolic diameter and wall thickness of the posterior wall were measured in the M-mode of the short-axis view. Two-dimensional speckle tracking (short-axis view) was used to determine the global (RS<sub>global</sub>) and anterior radial strain (RS<sub>ant</sub>). The extent of hypo-/akinesia, which reflects the area at risk, was identifiable by a low radial strain (<14.5%) and was expressed as the percentage of the circumference.<sup>12</sup>

### Blood Samples

The serum concentration of troponin I (210-2-HS, Life Diagnostics, West Chester, PA) was measured by an enzyme-linked immunosorbance assay on day 0 after 120 min of reperfusion to quantify the initial myocardial injury.

### Histology

After removal, the heart was weighed and immediately frozen at  $-20^{\circ}\text{C}$  for 5–10 min and cut into five slices perpendicular to the left ventricular long axis. The heart weight was normalized to the tibia length and EDV (remodeling index).<sup>13</sup> The infarcted area of the left ventricle was determined after incubation in 1% triphenyl tetrazolium chloride at  $37^{\circ}\text{C}$  for 10 min, as described previously.<sup>14</sup> Afterward, samples from the non-infarcted (remote) myocardium of the medial left ventricle were either fixed in paraformaldehyde and embedded in paraffin or snap-frozen in liquid nitrogen and stored at  $-80^{\circ}\text{C}$ . Cross-sections were stained with Sirius red (Direct Red 80, Sigma–Aldrich, St. Louis, MO) to quantify the degree of ventricular fibrosis. The ratio of collagen deposition was averaged from five areas using image analysis software (Image J, National Institute of Health, Bethesda, MD).<sup>15</sup> Staining with fluorescein-conjugated wheat germ agglutinin (W834, Molecular Probes, Eugene, OR) was used to determine the cross-sectional area of cardiomyocytes in remote areas of the left ventricle. The results from 25 to 50 single planimetric measurements were averaged.<sup>16</sup> Capillaries were counted after staining using isolectin IB<sub>4</sub> (I21414, Molecular Probes) and Alexa Fluor 568 (S11226, Molecular Probes) in five remote areas of the left ventricle.<sup>17</sup>

### Messenger RNA Quantification by Real-Time Polymerase Chain Reaction

Total RNA was extracted from samples of the remote myocardium using a commercial extraction kit (NucleoSpin RNA/Protein, Machery-Nagel, Düren, Germany). Total RNA (250 ng) was reverse transcribed into complementary DNA using a high-capacity reverse transcription kit (Applied Biosystems, Carlsbad, CA). The polymerase chain reaction (PCR) was performed using 50 ng of DNA, PCR master mix (TaqMan universal PCR mix, Applied Biosystems), and specific TaqMan probes (Applied Biosystems) for  $\alpha$ -myosin heavy chain ( $\alpha$ -MHC, Rn00568304\_m1),  $\beta$ -MHC (Rn00568328\_m1),  $\alpha$ -skeletal actin (Rn01426628\_g1), periostin (Rn01494627\_m1), sarcoplasmic reticulum  $\text{Ca}^{2+}$ -ATPase (Rn01499544\_m1),

and *caspase-3* (Rn00563902\_m1) on a PCR system (StepOne-Plus, Applied Biosystems). Relative quantity values were calculated according to the  $\Delta\Delta\text{Ct}$  method, which reflects the differences in the threshold for each target gene relative to the housekeeping gene *glyceraldehyde-3-phosphate dehydrogenase* (Rn99999916\_s1) and expression in normal uninjured hearts. The expression of  $\alpha$ -MHC was calculated as the percentages of  $\beta$ -MHC copies.

### Statistics

The results are presented as the mean and SD (Prism 5.01, GraphPad Software, La Jolla, CA). Differences between groups were investigated for significant changes using one-way ANOVA. If the null hypothesis could be rejected, a two-sided Dunnett *post hoc* test was applied to compare means of the sham, control, or xenon group with the control group as reference. For repeated measurements, a two-way ANOVA was used to investigate significant effects of time (within subject factor) and group (between subject factor). Greenhouse–Geisser correction was used if sphericity could not be assumed. In addition to the Dunnett *post hoc* test, a contrast analysis was applied to compare differences between consecutive time points. Levels of significance were displayed for  $P \leq 0.05$ ,  $P \leq 0.01$ , and  $P \leq 0.001$  (SPSS 19, IBM, Ehningen, Germany).

### Results

A total of 60 animals were included in the study and randomly assigned to either the sham group ( $n = 12$ ), control group ( $n = 17$ ), isoflurane group ( $n = 15$ ), or xenon group ( $n = 16$ ). During initial anesthesia induction, thus before the start of the experimental protocol at T0, all animals of different groups received a comparable amount of s-ketamine ( $256 \pm 7$  mg/kg). During the remaining time on day 0, the animals in the control and sham groups required  $55 \pm 16$  and  $37 \pm 13$  mg/kg s-ketamine, respectively. The rats in the isoflurane group did not require further s-ketamine; whereas the rats in the xenon group required a reduced averaged dosage of  $19 \pm 5$  mg/kg s-ketamine to maintain adequate anesthesia. In all, 46 animals survived the acute IR injury. Fourteen rats died from bleeding, cardiac failure, or recurrent ventricular fibrillation and 10 animals remained in the sham group and 12 in the control, isoflurane, and xenon group, respectively. Incidence of complications and thus acute survival were not different between groups (table 1).

### Acute Effects (T0–T3)

During the preconditioning period (T0–T1), HR and sAP decreased in all groups. Ischemia led to a further reduction in sAP with an accompanying increase in HR. During reperfusion sAP recovered, whereas HR further increased. After perfusion (T3), a significant reduction in CO, left ventricular end-diastolic diameter, RS<sub>global</sub>, and RS<sub>ant</sub> compared to T0 could be observed. RS<sub>ant</sub> in the sham and xenon groups

**Table 1.** Complications

|                          | Total | Control | Isoflurane | Xenon | Sham |
|--------------------------|-------|---------|------------|-------|------|
| Number of animals        | 60    | 17      | 15         | 16    | 12   |
| Survivors (4 wk)         | 46    | 12      | 12         | 12    | 10   |
| Causes of death (d 0)    | 14    | 5       | 3          | 4     | 2    |
| Bleeding                 | 5     | 1       | 1          | 1     | 2    |
| Cardiac failure          | 7     | 3       | 2          | 2     | 0    |
| Ventricular fibrillation | 2     | 1       | 0          | 1     | 0    |

Distribution of animals according to experimental groups and causes of death at day 0 during instrumentation.

remained significantly higher compared to that in the control group (table 2). The sizes of the hypo-/akinetic areas assessed by radial strain after IR amounted approximately 45% of the left ventricle in the control with no differences compared to that in the isoflurane or xenon group. Significantly lower levels of troponin I could only be measured in the sham group (fig. 2).

### Chronic Effects (T4)

No animals died between day 1 and day 28. The body weight gain and linear growth of the tibia were not significantly different between groups (average increases, respectively,  $68 \pm 4$  g and  $2.1 \pm 0.1$  mm). Compared to time point T3, at day 28 (T4) sAP and CO were significantly increased in all groups and thus returned to baseline values. HR remained unchanged.  $RS_{global}$  and  $RS_{ant}$ , on the contrary, were unchanged at day 28 compared to T3 and remain decreased compared to baseline (T0) in all infarct groups. At day 28,  $RS_{ant}$  was significantly higher only in the sham group (table 2). An overall increase in left ventricular end-diastolic diameter could be observed with significant lower values in the sham group (table 2).

The typical examples of pressure volume loops in figure 3A illustrate the differences in global cardiac function between the groups 4 weeks after ischemia. ANOVA indicated significant differences between groups, EDV, EF, and  $S_{PRSW}$  (fig. 3, B–D). *Post hoc* analysis showed that, compared to the control group, EDV was significantly lower after xenon anesthesia and in the sham group. EF and  $S_{PRSW}$  were significantly higher only in the xenon and sham groups.

Consistent with these differences, the normalized heart weight (to tibia length) was by far the highest in the control group (fig. 4A). The values measured in the isoflurane-treated animals and the sham group were significantly lower than those of the control group. Compared to the control group, the calculated remodeling index was significantly lower in the xenon group and sham-operated animals (fig. 4B). The thickness of the posterior wall was significantly different only between the control and sham groups (fig. 4C). No differences between groups for the cross-sectional areas of cardiomyocytes within the remote myocardium were found (fig. 4D).

The infarct size was approximately 50% of the initial hypo-/akinetic area, with no differences between the three infarct groups (fig. 5A). No effect on the amount of fibrosis

and capillary density in the remote area could be observed (fig. 5, B and C). Expression of *caspase-3* was reduced after isoflurane or xenon anesthesia and reached comparable levels to that of the sham-operated animals (fig. 5D).

The ratio of  $\alpha$ - and  $\beta$ -MHC was reduced in the control and isoflurane groups, whereas it remained nearly normal in the xenon group (fig. 6A). However, these effects just

**Table 2.** Hemodynamic and Echocardiographic Variables

|                      | Control<br>(n=12) | Isoflurane<br>(n=12) | Xenon<br>(n=12) | Sham<br>(n=10)           |
|----------------------|-------------------|----------------------|-----------------|--------------------------|
| HR, /min             |                   |                      |                 |                          |
| T0                   | 309 ± 45          | 288 ± 40             | 278 ± 30        | 290 ± 44                 |
| T1 <sup>\$\$\$</sup> | 283 ± 45          | 269 ± 41             | 229 ± 20        | 271 ± 30                 |
| T2 <sup>\$\$</sup>   | 319 ± 59          | 270 ± 49             | 274 ± 44        | 257 ± 27                 |
| T3 <sup>\$</sup>     | 335 ± 54          | 308 ± 32             | 315 ± 44        | 291 ± 26                 |
| T4                   | 281 ± 72          | 293 ± 43             | 305 ± 49        | 322 ± 61                 |
| sAP, mmHg            |                   |                      |                 |                          |
| T0                   | 125 ± 16          | 121 ± 19             | 119 ± 17        | 133 ± 27                 |
| T1 <sup>\$\$\$</sup> | 118 ± 16          | 99 ± 12              | 107 ± 36        | 113 ± 29                 |
| T2 <sup>\$\$\$</sup> | 111 ± 25          | 87 ± 11              | 104 ± 32        | 96 ± 14                  |
| T3 <sup>\$\$</sup>   | 123 ± 15          | 100 ± 19             | 109 ± 21        | 112 ± 19                 |
| T4 <sup>\$\$\$</sup> | 119 ± 15          | 125 ± 18             | 133 ± 23        | 129 ± 19                 |
| CO, ml/min           |                   |                      |                 |                          |
| T0                   | 165 ± 45          | 163 ± 29             | 167 ± 35        | 173 ± 37                 |
| T3 <sup>\$\$\$</sup> | 131 ± 30          | 157 ± 30             | 145 ± 29        | 147 ± 29                 |
| T4 <sup>\$\$</sup>   | 167 ± 32          | 163 ± 38             | 172 ± 51        | 167 ± 52                 |
| LVEDd, mm            |                   |                      |                 |                          |
| T0                   | 6.4 ± 1.0         | 6.8 ± 1.0            | 6.4 ± 1.4       | 6.6 ± 1.1                |
| T3 <sup>\$\$</sup>   | 5.9 ± 0.8         | 6.1 ± 1.0            | 6.4 ± 1.4       | 5.8 ± 0.8                |
| T4 <sup>\$\$\$</sup> | 9.0 ± 1.0         | 9.1 ± 1.2            | 8.1 ± 1.4       | 6.9 ± 1.4 <sup>***</sup> |
| $RS_{global}$ , %    |                   |                      |                 |                          |
| T0                   | 29 ± 14           | 31 ± 9               | 33 ± 8          | 32 ± 7                   |
| T3 <sup>\$\$\$</sup> | 15 ± 13           | 21 ± 5               | 20 ± 8          | 23 ± 6                   |
| T4                   | 22 ± 12           | 22 ± 6               | 20 ± 11         | 27 ± 12                  |
| $RS_{ant}$ , %       |                   |                      |                 |                          |
| T0                   | 32 ± 12           | 30 ± 7               | 29 ± 12         | 31 ± 7                   |
| T3 <sup>\$\$\$</sup> | 7 ± 4             | 12 ± 6               | 16 ± 10*        | 21 ± 11 <sup>**</sup>    |
| T4                   | 11 ± 9            | 11 ± 10              | 13 ± 12         | 32 ± 10 <sup>***</sup>   |

Effect of anesthesia on heart rate (HR), systolic arterial pressure (sAP), cardiac output (CO), left ventricular end-diastolic diameter (LVEDd), and global and anterior radial strain ( $RS_{global}$ ,  $RS_{ant}$ ). (Values are means  $\pm$  SD; contrast analysis vs. prior time point: <sup>\$</sup> $P < 0.05$  <sup>\$\$</sup> $P < 0.01$  <sup>\$\$\$</sup> $P < 0.001$ ; Dunnett *post hoc* test vs. control: \* $P < 0.05$  \*\* $P < 0.01$  \*\*\* $P < 0.001$ .)

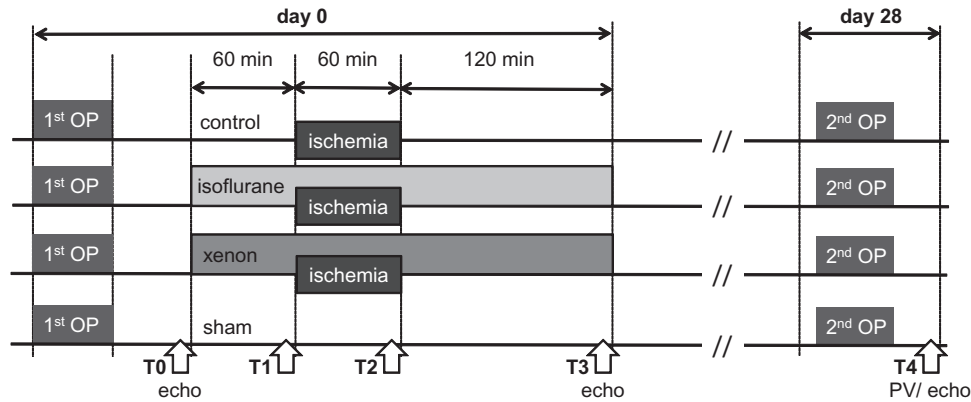

**Fig. 1.** Experimental protocol: animals were randomly assigned to the four study groups: control (s-ketamine), isoflurane, xenon, and sham. After instrumentation on day 0, (first OP) the rats were subjected to 60 minutes of myocardial ischemia and 120 minutes of reperfusion. After a follow-up of 28 days, conductance catheter measurements were performed following additional instrumentation (second OP). The arrows mark the measurement time points (T0–T4). Echocardiograms (echo) were acquired at T0, T3, and T4 and pressure volume loops (PV) at T4.

failed to reach statistical significance ( $P = 0.054$ ). Anesthetic management influenced the expression of  $\alpha$ -skeletal actin, with the highest values recorded in the control group (fig. 6B). The highest values of *periostin* expression were observed in the control and isoflurane groups, but significant differences between groups could be demonstrated (fig. 6C). Expression of *sarcoplasmic reticulum Ca<sup>2+</sup>-ATPase* seemed to be reduced in the control group, but this effect did not reach a level of significance (fig. 6D).

## Discussion

This investigation demonstrated for the first time the different functional and structural effects of isoflurane and xenon anesthesia on post-infarction cardiac remodeling. In the present model, 60 min of transient myocardial ischemia induced significant myocardial infarction, which led to progressive adverse remodeling after 4 weeks, with changes in structure, shape, and function. As expected, isoflurane and xenon reduced initial myocardial injury and hemodynamic compromise, whereas the extent of sequent adverse remodeling was different after 4 weeks. Decrease in remodeling index, impairment of cardiac function, and upregulation of fetal genes were impeded to a greater

extent in xenon- than isoflurane-anesthetized animals at the administered concentrations.

Until now, only the acute effects of isoflurane and xenon on IR injury have been described. Comparative investigations demonstrated that the effects of the initial myocardial injury are reduced to the same extent after conditioning with either isoflurane or xenon.<sup>14,18</sup> Although xenon is less cardiodepressant than isoflurane in normal hearts,<sup>19</sup> differences in the hemodynamic responses to acute ischemia or afterload increase are the result of diverse actions on the vascular system and not myocardial contractility.<sup>20,21</sup> These observations could be confirmed by the current investigation, especially by the reduced impairment of regional contractility ( $RS_{ant}$ ). Again, no differences in the effects of isoflurane or xenon on hemodynamics (HR, sAP, and CO), global function of the heart ( $RS_{global}$ ), or the reduction of myocardial injury (troponin I) in the acute phase were found. Regional function as displayed by  $RS_{ant}$  seemed to be better after xenon anesthesia. Although this difference disappeared, relevant changes could be described 4 weeks after IR injury.

The processes involved in adverse cardiac remodeling after myocardial infarction include hypertrophy, necrosis,

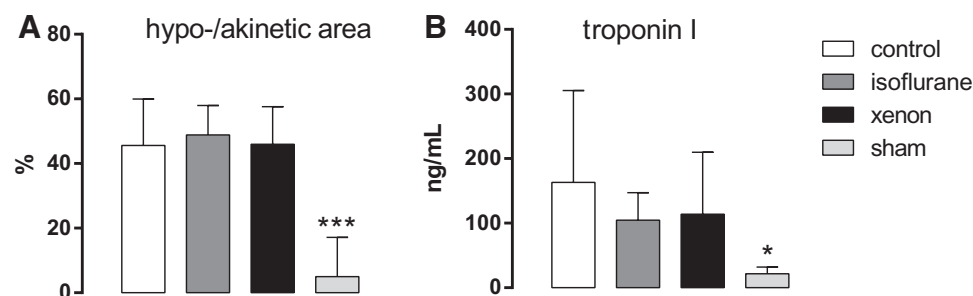

**Fig. 2.** Initial myocardial injury: effect of anesthesia on the size of hypo-/akinetic area determined by echocardiography (A) and serum concentrations of troponin I (B). (Values are means  $\pm$  SD, \*  $P < 0.05$  and \*\*\*  $P < 0.001$  versus control from ANOVA and post hoc test.)

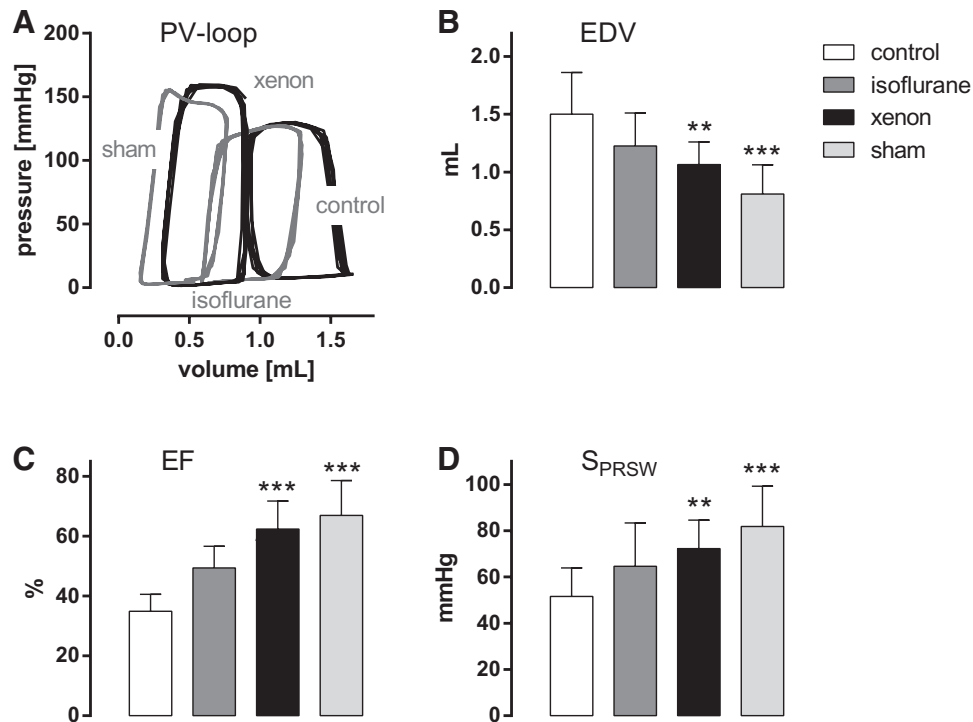

**Fig. 3.** Global cardiac function (T4): effect of anesthesia after 28 days on exemplary pressure volume (PV) loops (A), end-diastolic volume (EDV; B), ejection fraction (EF; C), and slope of the preload recruitable stroke work relation ( $S_{PRSW}$ ; D) as measured by conductance catheter (values are means  $\pm$  SD, \*\*  $P < 0.01$  \*\*\*  $P < 0.001$  vs. control from ANOVA and *post hoc* test).

apoptosis, fibrosis, angiogenesis, and contractile dysfunction, primarily in the remote area and also the peri-infarct area, leading to progressive ventricular dilatation and deterioration of function.<sup>22,23</sup> Permanent coronary artery

occlusion in the rat led to a 25% increase in heart weight, a 40–50% increase in ventricular volume/diameter, a 20% thinning of the posterior wall, and a 50–60% reduction of the EF after 4 weeks.<sup>24–27</sup> These results are consistent

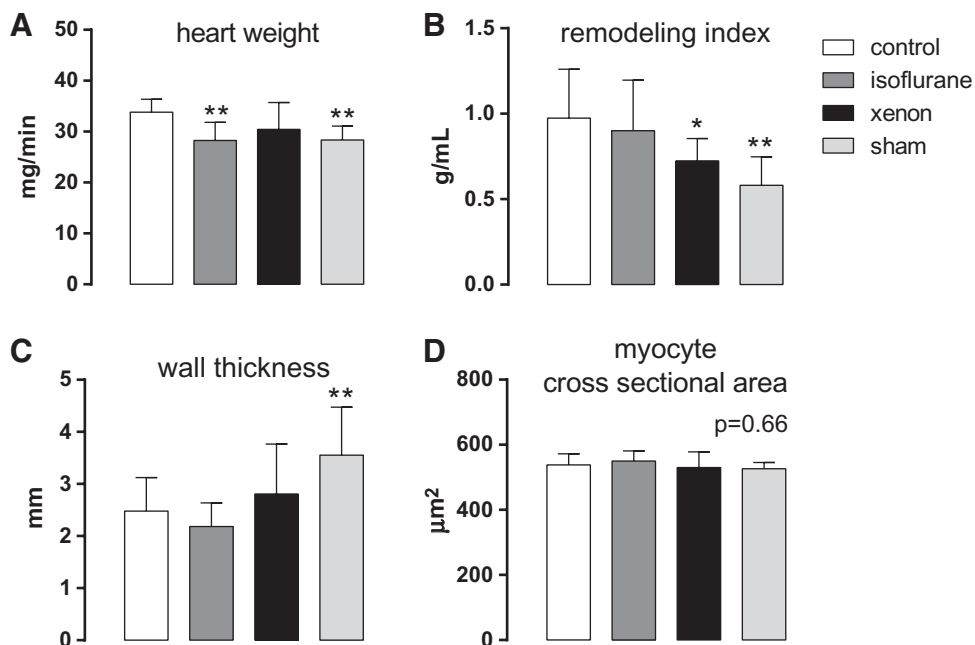

**Fig. 4.** Indices of myocardial hypertrophy (day 28): effect of anesthesia after 28 days on heart weight normalized to tibia length (A), remodeling index (B), thickness of the posterior wall (C), and cardiomyocyte cross-sectional area (D) (values are means  $\pm$  SD, \*  $P < 0.05$  \*\*  $P < 0.01$  vs. control from ANOVA and *post hoc* test).

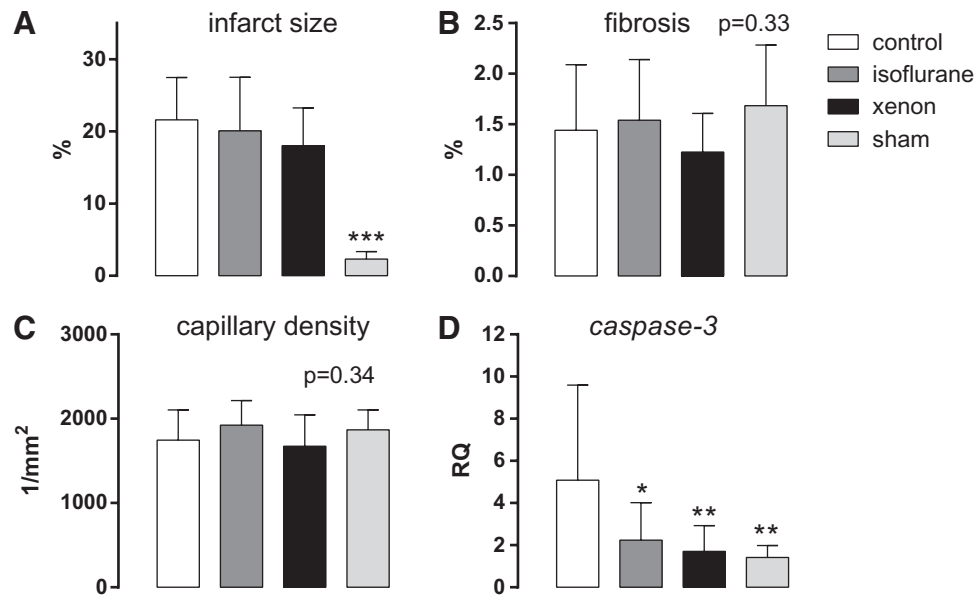

**Fig. 5.** Indices of myocardial remodeling (T4): effect of anesthesia after 28 days on infarct size (A), extent of fibrosis (B), capillary density (C), and relative quantity (RQ) of *caspase-3* expression (D) in the remote area (values are means  $\pm$  SD, \*  $P < 0.05$  \*\*  $P < 0.01$  \*\*\*  $P < 0.001$  vs. control from ANOVA and *post hoc* test).

with the findings of this investigation and published data after transient ischemia and could be displayed changes in shape (left ventricular end-diastolic diameter, EDV, heart weight, wall thickness, and remodeling index) and function (EF,  $S_{\text{PRSW}}$ ).<sup>28–30</sup> In contrast to the published data,<sup>24,27</sup> no significant increase in the myocyte cross-sectional area or fibrosis and no reduction in capillary density at a remote site were observed in untreated animals after IR-injury. As expected, the  $\alpha\beta$ -MHC ratio decreased and the expression of  $\alpha$ -skeletal actin and *periostin* increased during the 4 weeks after IR injury, indicating adverse remodeling.<sup>22,31</sup> Downregulation of *sarcoendoplasmic reticulum Ca<sup>2+</sup>-ATPase* did not reach a significant level,<sup>32</sup> whereas upregulation of the pro-apoptotic gene *caspase-3* was confirmed.<sup>33</sup>

Different therapies have been tested in animal models to limit post-infarction remodeling. Reperfusion within 60–120 min reduces ventricular dilation by 20% without reduction of the infarct size.<sup>34</sup> Treatment for 4 weeks with inhibitors of the angiotensin-converting enzyme,  $\beta$ 1-receptor antagonists, and  $\beta$ 2-agonists reduced heart weight by 30%, fibrosis by 40–50%, and dilatation by 10–20%, and it improved EF by 25%.<sup>26,35–37</sup>

Compared to these findings, xenon anesthesia inhibited ventricular dilation (EDV, remodeling index), functional deterioration (EF,  $S_{\text{PRSW}}$ ), and expression of fetal genes ( $\beta$ -MHC, *periostin*) better than isoflurane, although infarct size and initial myocardial injury were comparable. The lower heart weight in combination with a thin ventricular wall and larger volume might indicate a greater loss of cardiomyocytes after isoflurane anesthesia. In contrast, the protective effects of xenon exceed the action of angiotensin-converting enzyme inhibitors and  $\beta$ 1 receptor antagonists, with 30%

less EDV and a retained EF of 62%, which did not differ from sham animals, while EF of untreated animals was 35%. Only the EF and  $S_{\text{PRSW}}$  as a load independent parameter of contractility were able to demonstrate functional differences between isoflurane, xenon, and control groups, whereas echocardiographic values failed ( $SR_{\text{ant}}$ ,  $RS_{\text{global}}$ ) 4 weeks after IR injury. Although comparative studies in rats between strain and pressure–volume loop analysis are missing, an echocardiogram should include all segments of the left ventricle to describe contractility after myocardial infarction.<sup>38</sup>

In summary, these differences between isoflurane and xenon surprisingly indicated that short-term therapy in the acute phase was able to prevent adverse cardiac remodeling, independent of the initial reduction of myocardial injury. However, at the concentrations administered, xenon appeared to be superior to isoflurane in prevention of ischemic damage and promotion of long-term recovery of contractile function.

The mechanisms can only be speculative. Whereas transcriptional changes of isoflurane after pre- or post-conditioning have been described in detail,<sup>7</sup> less is known about the effects of xenon. Differences in the activation of pro-survival and death-promoting signaling kinases were observed. Preconditioning was mediated, among others, by the activation of the mitogen-activated protein kinase, extracellular signal-regulated kinase, and Akt1 pathways.<sup>39,40</sup> Whereas xenon and isoflurane activated the phosphatidylinositol 3-kinase, Akt1, glycogen synthase kinase 3, extracellular signal-regulated kinase, and p38 $\alpha$ , only isoflurane phosphorylated c-Jun N terminal kinases.<sup>41,42</sup> Activation of c-Jun N terminal kinases promotes apoptosis and pathologic ventricular dilation.<sup>43</sup> In contrast to isoflurane,

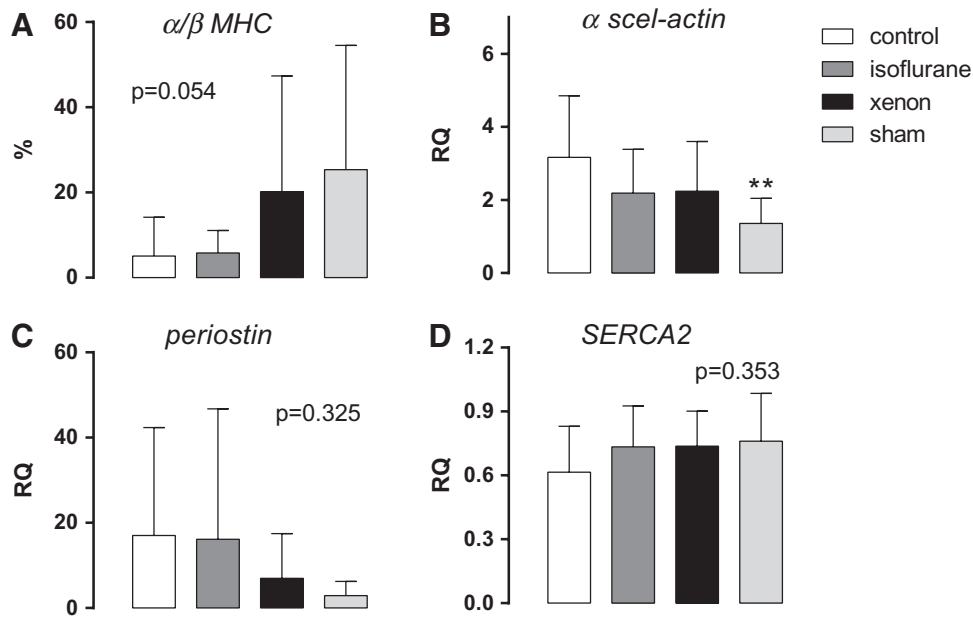

**Fig. 6.** Gene expression (day 28): effect of anesthesia after 28 days on the ratio of  $\alpha$ - and  $\beta$ -MHC (A) and relative quantity (RQ) of  $\alpha$ -skeletal (scel) actin (B), periostin (C), and sarco/endoplasmic reticulum  $Ca^{2+}$ -ATPase (SERCA2) (D) in the remote area (values are means  $\pm$  SD,  $** P < 0.01$  vs. control from ANOVA and *post hoc* test).

xenon led to a translocation of heat shock protein 27 from the cytosolic fraction to the sarcomere fraction.<sup>39</sup> This has been shown to be relevant for the recovery of contractile function after IR injury.<sup>44-46</sup> It has also been demonstrated that heat shock protein 27 phosphorylation attenuates doxorubicin-induced dilative cardiomyopathy.<sup>47</sup> These findings require further comparative studies. Minor changes during the early phase might influence stress-mediated expansion of a non-infarcted myocardium (Grossman concept).<sup>48</sup>

As all animals received a substantial amount of *s*-ketamine and the cumulative dosage differs between groups, possible different interactions with isoflurane and xenon might influence the results. Binding sites for *s*-ketamine were described on cholinergic, adrenergic, ion channels (calcium, sodium), opioid and N-methyl d-aspartate receptors even in the heart.<sup>49</sup> Resulting direct or indirect sympathicomimetic properties (release of catecholamines and inhibition of reuptake) were opposed by a direct negative inotropic and N-methyl d-aspartate receptor 1-mediated negative chronotropic effect.<sup>50</sup> Although stimulation of opioid<sup>51</sup> and adrenergic receptors<sup>52</sup> before ischemia induced cardioprotection, *s*-ketamine does not affect ischemic preconditioning<sup>53</sup> or phosphorylation in IR injury of involved protein kinases.<sup>39</sup> Furthermore, no differences for HR, sAP, and anesthetic depth, which might influence IR injury, could be detected between groups. Thus, a relevant drug interaction between *s*-ketamine and isoflurane, respectively, xenon seemed to be unlikely.

It is noteworthy that in terms of anesthetic state, the corresponding MAC value of 0.6 vol% isoflurane was comparable in humans and rats (0.46 *vs.* 0.43) but was different for

70 vol% xenon (1.0 *vs.* 0.43). This suggests species-dependent different mechanism of action.<sup>54</sup> While the species-dependent effects of anesthetic gases on anesthetic depth and baroreceptor reflexes are described in detail, the sensitivity of the cardiomyocytes against them has not been compared yet. However, MAC comparisons have been the standard in anesthetic studies and led to comparable hemodynamic conditions, as in the current investigation. Whereas the extent of neuroprotection by xenon<sup>54</sup> and isoflurane<sup>55</sup> was dose dependent, the effect of isoflurane within the range of 0.25 and 1.75 MAC on the myocardium remained controversial. Reduction of myocardial infarct size by isoflurane seemed to be independent of concentration in the rat heart,<sup>56</sup> but dependent in dogs.<sup>57</sup> The mechanism of protection was dependent of dosage, as protein kinase C $\epsilon$  was phosphorylated only at low concentrations (0.4 MAC)<sup>56</sup> and was additionally influenced by coronary flow, especially in animals with preformed coronary collaterals.<sup>57</sup> Comparable results are missing for xenon, but 20 vol% of xenon was insufficient for post-conditioning in the rat heart.<sup>58</sup> Thus, it would be difficult to separate direct or indirect mediated effects of anesthetics on the heart, and further studies with various concentrations are needed.

Further limitations of this study include the low animal number per group and the short observational period. The effects on gene expression and cardiac function will be more pronounced after 3 months.<sup>37,59</sup> However, as the differences between isoflurane and xenon were not predictable, power calculations would have been difficult. Unfortunately, assessment of hemodynamics and echocardiograms was carried out unblinded from time point T0 to T3.



In conclusion, despite similar acute cardioprotective properties, xenon impeded adverse cardiac remodeling after IR injury more effectively than isoflurane, especially regarding the decrease in ventricular dilatation and the improvement of cardiac function.

Special thanks to Renate Nadenau and Christian Beckers (Technicians, Department of Anesthesiology, University Hospital Aachen, Aachen, Germany) for their help in our laboratory.

## References

- Landesberg G, Beattie WS, Mosseri M, Jaffe AS, Alpert JS: Perioperative myocardial infarction. *Circulation* 2009; 119:2936–44
- Hill JA, Olson EN: Cardiac plasticity. *N Engl J Med* 2008; 358:1370–80
- Frey N, Katus HA, Olson EN, Hill JA: Hypertrophy of the heart: A new therapeutic target? *Circulation* 2004; 109:1580–9
- Takemura G, Nakagawa M, Kanamori H, Minatoguchi S, Fujiwara H: Benefits of reperfusion beyond infarct size limitation. *Cardiovasc Res* 2009; 83:269–76
- Tanaka K, Ludwig LM, Kersten JR, Pagel PS, Warltier DC: Mechanisms of cardioprotection by volatile anesthetics. *ANESTHESIOLOGY* 2004; 100:707–21
- Pagel PS: Cardioprotection by noble gases. *J Cardiothorac Vasc Anesth* 2010; 24:143–63
- Lucchinetti E, da Silva R, Pasch T, Schaub MC, Zaugg M: Anaesthetic preconditioning but not postconditioning prevents early activation of the deleterious cardiac remodeling programme: Evidence of opposing genomic responses in cardioprotection by pre- and postconditioning. *Br J Anaesth* 2005; 95:140–52
- Steendijk P, Staal E, Jukema JW, Baan J: Hypertonic saline method accurately determines parallel conductance for dual-field conductance catheter. *Am J Physiol Heart Circ Physiol* 2001; 281:H755–63
- Glower DD, Spratt JA, Snow ND, Kabas JS, Davis JW, Olsen CO, Tyson GS, Sabiston DC Jr, Rankin JS: Linearity of the Frank-Starling relationship in the intact heart: The concept of pre-load recruitable stroke work. *Circulation* 1985; 71:994–1009
- Bal MP, de Vries WB, van Oosterhout MF, Baan J, van der Wall EE, van Bel F, Steendijk P: Long-term cardiovascular effects of neonatal dexamethasone treatment: Hemodynamic follow-up by left ventricular pressure-volume loops in rats. *J Appl Physiol* 2008; 104:446–50
- Bjornerheim R, Groggaard HK, Kjekshus H, Attramadal H, Smiseth OA: High frame rate Doppler echocardiography in the rat: An evaluation of the method. *Eur J Echocardiogr* 2001; 2:78–87
- Treguer F, Donal E, Tamareille S, Ghaboura N, Derumeaux G, Furber A, Prunier F: Speckle tracking imaging improves in vivo assessment of EPO-induced myocardial salvage early after ischemia-reperfusion in rats. *Am J Physiol Heart Circ Physiol* 2010; 298:H1679–86
- De Castro S, Caselli S, Maron M, Pelliccia A, Cavarretta E, Maddukuri P, Cartoni D, Di Angelantonio E, Kuvin JT, Patel AR, Pandian NG: Left ventricular remodeling index (LVRI) in various pathophysiological conditions: A real-time three-dimensional echocardiographic study. *Heart* 2007; 93:205–9
- Hein M, Roehl AB, Baumert JH, Bantes B, Bleilevens C, Bernstein N, Steendijk P, Rossaint R: Establishment of a porcine right ventricular infarction model for cardioprotective actions of xenon and isoflurane. *Acta Anaesthesiol Scand* 2008; 52:1194–203
- Fraccarollo D, Widder JD, Galuppo P, Thum T, Tsikas D, Hoffmann M, Ruettgen H, Ertl G, Bauersachs J: Improvement in left ventricular remodeling by the endothelial nitric oxide synthase enhancer AVE9488 after experimental myocardial infarction. *Circulation* 2008; 118:818–27
- Shiojima I, Sato K, Izumiya Y, Schiekofer S, Ito M, Liao R, Colucci WS, Walsh K: Disruption of coordinated cardiac hypertrophy and angiogenesis contributes to the transition to heart failure. *J Clin Invest* 2005; 115:2108–18
- Siragusa M, Katare R, Meloni M, Damilano F, Hirsch E, Emanuelli C, Madeddu P: Involvement of phosphoinositide 3-kinase gamma in angiogenesis and healing of experimental myocardial infarction in mice. *Circ Res* 2010; 106:757–68
- Weber NC, Toma O, Wolter JI, Obal D, Müllenheim J, Preckel B, Schlack W: The noble gas xenon induces pharmacological preconditioning in the rat heart in vivo via induction of PKC-epsilon and p38 MAPK. *Br J Pharmacol* 2005; 144:123–32
- Preckel B, Ebel D, Müllenheim J, Frässdorf J, Thämer V, Schlack W: The direct myocardial effects of xenon in the dog heart in vivo. *Anesth Analg* 2002; 94:545–51
- Hein M, Roehl AB, Baumert JH, Bleilevens C, Fischer S, Steendijk P, Rossaint R: Xenon and isoflurane improved biventricular function during right ventricular ischemia and reperfusion. *Acta Anaesthesiol Scand* 2010; 54:470–8
- Roehl AB, Steendijk P, Rossaint R, Bleilevens C, Goetzenich A, Hein M: Xenon is not superior to isoflurane on cardiovascular function during experimental acute pulmonary hypertension. *Acta Anaesthesiol Scand* 2012; 56:449–58
- Ferrari R, Ceconi C, Campo G, Cangiano E, Cavazza C, Secchiero P, Tavazzi L: Mechanisms of remodelling: A question of life (stem cell production) and death (myocyte apoptosis). *Circ J* 2009; 73:1973–82
- Cohn JN, Ferrari R, Sharpe N: Cardiac remodeling—concepts and clinical implications: A consensus paper from an international forum on cardiac remodeling. Behalf of an International Forum on Cardiac Remodeling. *J Am Coll Cardiol* 2000; 35:569–82
- Oriyanhan W, Tsuneyoshi H, Nishina T, Matsuoka S, Ikeda T, Komeda M: Determination of optimal duration of mechanical unloading for failing hearts to achieve bridge to recovery in a rat heterotopic heart transplantation model. *J Heart Lung Transplant* 2007; 26:16–23
- Soppa GK, Lee J, Stagg MA, Felkin LE, Barton PJ, Siedlecka U, Youssef S, Yacoub MH, Terracciano CM: Role and possible mechanisms of clenbuterol in enhancing reverse remodeling during mechanical unloading in murine heart failure. *Cardiovasc Res* 2008; 77:695–706
- Watanabe R, Ogawa M, Suzuki J, Hirata Y, Nagai R, Isobe M: A comparison between imidapril and ramipril on attenuation of ventricular remodeling after myocardial infarction. *J Cardiovasc Pharmacol* 2012; 59:323–30
- de Waard MC, van der Velden J, Bito V, Ozdemir S, Biesmans L, Boontje NM, Dekkers DH, Schoonderwoerd K, Schuurbiens HC, de Crom R, Stienen GJ, Sipido KR, Lamers JM, Duncker DJ: Early exercise training normalizes myofilament function and attenuates left ventricular pump dysfunction in mice with a large myocardial infarction. *Circ Res* 2007; 100:1079–88
- Rabald S, Marx G, Mix B, Stephani C, Kamprad M, Cross M, Boltze J, Briest W, Zimmer HG, Deten A: Cord blood cell therapy alters LV remodeling and cytokine expression but does not improve heart function after myocardial infarction in rats. *Cell Physiol Biochem* 2008; 21:395–408
- Wei M, Xin P, Li S, Tao J, Li Y, Li J, Liu M, Li J, Zhu W, Redington AN: Repeated remote ischemic postconditioning protects against adverse left ventricular remodeling and improves survival in a rat model of myocardial infarction. *Circ Res* 2011; 108:1220–5
- Youn TJ, Kim HS, Oh BH: Ventricular remodeling and transforming growth factor-beta 1 mRNA expression after nontransmural myocardial infarction in rats: Effects of angiotensin converting enzyme inhibition and angiotensin II type 1 receptor blockade. *Basic Res Cardiol* 1999; 94:246–53

31. Katsuragi N, Morishita R, Nakamura N, Ochiai T, Taniyama Y, Hasegawa Y, Kawashima K, Kaneda Y, Ogihara T, Sugimura K: Periostin as a novel factor responsible for ventricular dilation. *Circulation* 2004; 110:1806–13
32. Wang J, Marui A, Ikeda T, Komeda M: Partial left ventricular unloading reverses contractile dysfunction and helps recover gene expressions in failing rat hearts. *Interact Cardiovasc Thorac Surg* 2008; 7:27–31
33. Roy S, Khanna S, Kuhn DE, Rink C, Williams WT, Zweier JL, Sen CK: Transcriptome analysis of the ischemia-reperfused remodeling myocardium: Temporal changes in inflammation and extracellular matrix. *Physiol Genomics* 2006; 25:364–74
34. Boyle MP, Weisman HF: Limitation of infarct expansion and ventricular remodeling by late reperfusion. Study of time course and mechanism in a rat model. *Circulation* 1993; 88:2872–83
35. Schieffer B, Wirger A, Meybrunn M, Seitz S, Holtz J, Riede UN, Drexler H: Comparative effects of chronic angiotensin-converting enzyme inhibition and angiotensin II type 1 receptor blockade on cardiac remodeling after myocardial infarction in the rat. *Circulation* 1994; 89:2273–82
36. Mulder P, Devaux B, Richard V, Henry JP, Wimart MC, Thibout E, Macé B, Thuillez C: Early versus delayed angiotensin-converting enzyme inhibition in experimental chronic heart failure. Effects on survival, hemodynamics, and cardiovascular remodeling. *Circulation* 1997; 95:1314–9
37. Ahmet I, Morrell C, Lakatta EG, Talan MI: Therapeutic efficacy of a combination of a beta1-adrenoreceptor (AR) blocker and beta2-AR agonist in a rat model of postmyocardial infarction dilated heart failure exceeds that of a beta1-AR blocker plus angiotensin-converting enzyme inhibitor. *J Pharmacol Exp Ther* 2009; 331:178–85
38. Migrino RQ, Zhu X, Pajewski N, Brahmabhatt T, Hoffmann R, Zhao M: Assessment of segmental myocardial viability using regional 2-dimensional strain echocardiography. *J Am Soc Echocardiogr* 2007; 20:342–51
39. Weber NC, Toma O, Wolter JI, Wirthle NM, Schlack W, Preckel B: Mechanisms of xenon- and isoflurane-induced preconditioning - a potential link to the cytoskeleton via the MAPKAPK-2/HSP27 pathway. *Br J Pharmacol* 2005; 146:445–55
40. Kunuthur SP, Mocanu MM, Hemmings BA, Hausenloy DJ, Yellon DM: The Akt1 isoform is an essential mediator of ischemic preconditioning. *J Cell Mol Med* 2012; 16:1739–49
41. Hamaya Y, Takeda T, Dohi S, Nakashima S, Nozawa Y: The effects of pentobarbital, isoflurane, and propofol on immediate-early gene expression in the vital organs of the rat. *Anesth Analg* 2000; 90:1177–83
42. Weber NC, Stursberg J, Wirthle NM, Toma O, Schlack W, Preckel B: Xenon preconditioning differently regulates p44/42 MAPK (ERK 1/2) and p46/54 MAPK (JNK 1/2 and 3) in vivo. *Br J Anaesth* 2006; 97:298–306
43. Yeh CC, Li H, Malhotra D, Turcato S, Nicholas S, Tu R, Zhu BQ, Cha J, Swigart PM, Myagmar BE, Baker AJ, Simpson PC, Mann MJ: Distinctive ERK and p38 signaling in remote and infarcted myocardium during post-MI remodeling in the mouse. *J Cell Biochem* 2010; 109:1185–91
44. Sakamoto K, Urushidani T, Nagao T: Translocation of HSP27 to sarcomere induced by ischemic preconditioning in isolated rat hearts. *Biochem Biophys Res Commun* 2000; 269:137–42
45. Arnaud C, Joyeux-Faure M, Bottari S, Godin-Ribuot D, Ribuot C: New insight into the signalling pathways of heat stress-induced myocardial preconditioning: Protein kinase Cepsilon translocation and heat shock protein 27 phosphorylation. *Clin Exp Pharmacol Physiol* 2004; 31:129–33
46. Guay J, Lambert H, Gingras-Breton G, Lavoie JN, Huot J, Landry J: Regulation of actin filament dynamics by p38 map kinase-mediated phosphorylation of heat shock protein 27. *J Cell Sci* 1997; 110 (Pt 3):357–68
47. Venkatakrishnan CD, Tewari AK, Moldovan L, Cardounel AJ, Zweier JL, Kuppusamy P, Ilangovan G: Heat shock protects cardiac cells from doxorubicin-induced toxicity by activating p38 MAPK and phosphorylation of small heat shock protein 27. *Am J Physiol Heart Circ Physiol* 2006; 291:H2680–91
48. Opie LH, Commerford PJ, Gersh BJ, Pfeffer MA: Controversies in ventricular remodelling. *Lancet* 2006; 367:356–67
49. Huang CF, Su MJ: Positive inotropic action of NMDA receptor antagonist (+)-MK801 in rat heart. *J Biomed Sci* 1999; 6:387–98
50. Kohrs R, Durieux ME: Ketamine: Teaching an old drug new tricks. *Anesth Analg* 1998; 87:1186–93
51. Gross GJ: Role of opioids in acute and delayed preconditioning. *J Mol Cell Cardiol* 2003; 35:709–18
52. Spear JF, Prabu SK, Galati D, Raza H, Anandatheerthavarada HK, Avadhani NG: beta1-Adrenoreceptor activation contributes to ischemia-reperfusion damage as well as playing a role in ischemic preconditioning. *Am J Physiol Heart Circ Physiol* 2007; 292:H2459–66
53. Müllenheim J, Frässdorf J, Preckel B, Thämer V, Schlack W: Ketamine, but not S(+)-ketamine, blocks ischemic preconditioning in rabbit hearts in vivo. *ANESTHESIOLOGY* 2001; 94:630–6
54. David HN, Haelewyn B, Rouillon C, Lecoq M, Chazalviel L, Apiou G, Risso JJ, Lemaire M, Abraini JH: Neuroprotective effects of xenon: A therapeutic window of opportunity in rats subjected to transient cerebral ischemia. *FASEB J* 2008; 22:1275–86
55. Xiong L, Zheng Y, Wu M, Hou L, Zhu Z, Zhang X, Lu Z: Preconditioning with isoflurane produces dose-dependent neuroprotection via activation of adenosine triphosphate-regulated potassium channels after focal cerebral ischemia in rats. *Anesth Analg* 2003; 96:233–7
56. Obal D, Weber NC, Zacharowski K, Toma O, Dettwiler S, Wolter JI, Kratz M, Müllenheim J, Preckel B, Schlack W: Role of protein kinase C-epsilon (PKCepsilon) in isoflurane-induced cardioprotection. *Br J Anaesth* 2005; 94:166–73
57. Kehl F, Krolikowski JG, Mraovic B, Pagel PS, Wartler DC, Kersten JR: Is isoflurane-induced preconditioning dose related? *ANESTHESIOLOGY* 2002; 96:675–80
58. Schieberr C, Huhn R, Heinen A, Weber NC, Hollmann MW, Schlack W, Preckel B: Postconditioning by xenon and hypothermia in the rat heart in vivo. *Eur J Anaesthesiol* 2010; 27:734–9
59. Shioura KM, Geenen DL, Goldspink PH: Assessment of cardiac function with the pressure-volume conductance system following myocardial infarction in mice. *Am J Physiol Heart Circ Physiol* 2007; 293:H2870–7
